# Supplementary material
Source: PubMed Central journal article supplement (PMC4808363)
Supplement: NIHMS733646-supplement.pdf [file NIHMS733646-supplement.pdf]

Table 1

Fundus Photograph Grading System

| Grade | Description                                                                                                                                                                                                              |
|-------|--------------------------------------------------------------------------------------------------------------------------------------------------------------------------------------------------------------------------|
| 1     | No drusen or small nonextensive drusen, without pigment abnormalities                                                                                                                                                    |
| 2     | Extensive small drusen or nonextensive intermediate drusen or pigment abnormalities associated with AMD                                                                                                                  |
| 3     | Extensive intermediate drusen or any large drusen                                                                                                                                                                        |
| 4     | GA, with or without involvement of the center of the macula                                                                                                                                                              |
| 5     | Exudative AMD, including nondrusenoid pigment epithelial detachments, serous or hemorrhagic retinal detachments, subretinal or subRPE hemorrhage or fibrosis, or photocoagulation scars consistent with treatment of AMD |
